# Supplementary material for: Description, microhabitat selection and infection patterns of sealworm larvae (Pseudoterranova decipiens species complex, nematoda: ascaridoidea) in fishes from Patagonia, Argentina
Source: PubMed Central journal article supplement (PMC3847798; doi:10.1186/1756-3305-6-252), 2013-08-29
Supplement: 1756-3305-6-252-S1.pdf [file 1756-3305-6-252-S1.pdf]

**Additional file 1 Check list of records of third-stage larvae of *Pseudoterranova* spp. in fishes from South America.** Abbreviations: Bc, body cavity; Li, liver; MA, host muscles analysed for parasites; MH, microhabitat; Me, mesenteries; MS, mean number of sealworms; Mu, muscle; N.S., not specified; NI, number of infected hosts; TL, total length  $\pm$  standard deviation (or range).

| Order/Family             | Species                         | Locality*                         | <i>n</i> | TL (cm)          | MA   | MH         | NI  | MS  | References |
|--------------------------|---------------------------------|-----------------------------------|----------|------------------|------|------------|-----|-----|------------|
| <b>Anguilliformes</b>    |                                 |                                   |          |                  |      |            |     |     |            |
| Congridae                | <i>Conger orbignianus</i>       | North Argentina <sup>a</sup>      | 50       | –                | Yes  | Me         | 1   | 1   | [1]        |
| <b>Atheriniformes</b>    |                                 |                                   |          |                  |      |            |     |     |            |
| Atherinopsidae           | <i>Odontesthes nigricans</i>    | Patagonia, Argentina <sup>a</sup> | 125      | (16.3–16.6)**    | No   | Bc         | –   | –   | [2]        |
|                          | <i>Odontesthes smitti</i>       | Patagonia, Argentina <sup>a</sup> | 118      | (21.7–28.3)**    | No   | Bc         | 1   | 10  | [3]        |
| <b>Batrachoidiformes</b> |                                 |                                   |          |                  |      |            |     |     |            |
| Batrachoididae           | <i>Aphos porosus</i>            | Central Chile <sup>b</sup>        | 8        | 28.3 $\pm$ 1.5   | N.S. | –          | 6   | 10  | [4]        |
|                          |                                 | Central Chile <sup>a</sup>        | 30       | 26.8 $\pm$ 3.9   | Yes  | Bc, Me, Mu | 24  | 128 | [5]        |
|                          |                                 | South Chile <sup>c</sup>          | 13       | –                | Yes  | Mu         | 6   | 10  | [6]        |
|                          | <i>Porichthys porosissimus</i>  | North Argentina <sup>a</sup>      | 166      | (11.5–29.7)      | No   | Bc         | 26  | 39  | [7]        |
| <b>Beloniformes</b>      |                                 |                                   |          |                  |      |            |     |     |            |
| Belonidae                | <i>Tylosurus acus acus</i>      | Brazil <sup>a</sup>               | 31       | (58.0–105.5)     | N.S. | Me         | 3   | 4   | [8]        |
| <b>Gadiformes</b>        |                                 |                                   |          |                  |      |            |     |     |            |
| Gadidae                  | <i>Micromesistius australis</i> | South Chile <sup>a</sup>          | 61       | (26.0–57.0)      | N.S. | –          | 3   | 4   | [9]        |
| Macrouridae              | <i>Nezumia pulchella</i>        | North Chile <sup>a</sup>          | 167      | (26.6–32.1)**    | No   | –          | 2   | 2   | [10]       |
|                          |                                 | Central Chile <sup>a</sup>        | 50       | 31.1 $\pm$ 2.3   | No   | –          | 1   | 1   | [10]       |
| Merlucciidae             | <i>Macruronus magellanicus</i>  | South Chile <sup>c</sup>          | 288      | –                | Yes  | Mu         | 9   | 29  | [6]        |
|                          |                                 | Central Chile <sup>b</sup>        | 3        | 134.3 $\pm$ 55.7 | N.S. | –          | 1   | 1   | [4]        |
|                          |                                 | South Chile <sup>b</sup>          | 4        | (22.0–28.0)      | Yes  | Mu         | 1   | 1   | [11]       |
|                          | <i>Merluccius australis</i>     | South Chile <sup>b</sup>          | 685      | (45.0–95.0)      | No   | Bc, Me, Mu | 76  | 99  | [12]       |
|                          | <i>Merluccius gayi gayi</i>     | Central Chile <sup>b</sup>        | 1051     | (42.7–46.6)**    | No   | Me         | 211 | 897 | [13]       |
|                          |                                 | South Chile <sup>b</sup>          | 121      | 45.4 $\pm$ 10.1  | No   | Me         | 42  | 213 | [13]       |
|                          |                                 | South Chile <sup>c</sup>          | 34       | –                | Yes  | Mu         | 19  | 71  | [6]        |
|                          |                                 | South Chile <sup>b</sup>          | 17       | (36.0–50.0)      | Yes  | Mu         | 4   | 8   | [11]       |
|                          | <i>Merluccius hubbsi</i>        | Patagonia, Argentina <sup>a</sup> | 278      | (38.7–40.4)**    | No   | Me         | 2   | 2   | [14]       |
|                          |                                 | Patagonia, Argentina <sup>a</sup> | 42       | (57.0–78.0)      | Yes  | Mu         | 4   | 8   | [15]       |
| <b>Mugiliformes</b>      |                                 |                                   |          |                  |      |            |     |     |            |
| Mugilidae                | <i>Mugil cephalus</i>           | Central Chile <sup>c</sup>        | 107      | (15.5–46.0)      | No   | Hi         | 1   | 1   | [16]       |

**Ophidiiformes**

## Ophidiidae

|                                |                                   |     |              |      |        |   |    |         |
|--------------------------------|-----------------------------------|-----|--------------|------|--------|---|----|---------|
| <i>Genypterus</i> sp.          | South Chile <sup>c</sup>          | 1   | 60           | N.S. | Li, Me | – | –  | [17]    |
| <i>Genypterus blacodes</i>     | Argentina <sup>b</sup>            | 101 | (24.0–127.0) | No   | Me     | 4 | 20 | [18]    |
|                                | South Chile <sup>c</sup>          | 5   | –            | Yes  | Mu     | 2 | 36 | [6]     |
| <i>Genypterus brasiliensis</i> | Patagonia, Argentina <sup>b</sup> | 31  | (40.0–75.0)  | No   | Me     | 6 | 8  | [18]*** |
|                                | Brazil <sup>a</sup>               | 55  | 29.0–70.0    | N.S. | Me     | 3 | 5  | [19]*** |
|                                | Brazil <sup>b</sup>               | 74  | (41.5–93)    | Yes  | Me     | 4 | 5  | [20]*** |
|                                | Brazil <sup>a</sup>               | 74  | (41.5–93)    | Yes  | Me     | 8 | 22 | [20]*** |
| <i>Genypterus chilensis</i>    | Central Chile <sup>c</sup>        | 80  | (43.6–73.5)  | Yes  | Li, Mu | 5 | 22 | [21]    |
|                                | South Chile <sup>c</sup>          | 7   | –            | Yes  | Mu     | 4 | 27 | [6]     |
|                                | South Chile <sup>b</sup>          | 18  | (41.0–55.0)  | Yes  | Mu     | 9 | 12 | [11]    |
| <i>Raneya brasiliensis</i>     | Patagonia, Argentina <sup>a</sup> | 107 | 24.5 ± 1.7   | Yes  | –      | 1 | 1  | [22]    |

**Perciformes**

## Blenniidae

|                               |                          |    |            |    |    |   |   |      |
|-------------------------------|--------------------------|----|------------|----|----|---|---|------|
| <i>Hypsoblennius sordidus</i> | South Chile <sup>a</sup> | 12 | (4.8–10.2) | No | Mu | 1 | 1 | [23] |
|-------------------------------|--------------------------|----|------------|----|----|---|---|------|

## Carangidae

|                          |                            |     |             |      |    |    |     |      |
|--------------------------|----------------------------|-----|-------------|------|----|----|-----|------|
| <i>Caranx hippos</i>     | Brazil <sup>a</sup>        | 60  | (27.0–64.0) | N.S. | –  | 6  | 9   | [24] |
| <i>Caranx latus</i>      | Brazil <sup>a</sup>        | 55  | (26.0–43.0) | N.S. | –  | 18 | 401 | [24] |
| <i>Trachurus murphyi</i> | North Chile <sup>b</sup>   | 600 | 36.3 ± 2.9  | No   | –  | 2  | 3   | [25] |
|                          | Central Chile <sup>b</sup> | 600 | 33.9 ± 2.3  | No   | –  | 17 | 28  | [25] |
|                          | South Chile <sup>c</sup>   | 35  | –           | Yes  | Mu | 10 | 60  | [6]  |
|                          | South Chile <sup>b</sup>   | 16  | (34.0–47.0) | Yes  | Mu | 5  | 12  | [11] |
|                          | Chile–Oceanic <sup>b</sup> | 183 | 43.2 ± 2.1  | No   | –  | 3  | 3   | [25] |

## Pinguipedidae

|                                 |                                   |     |               |    |    |    |     |      |
|---------------------------------|-----------------------------------|-----|---------------|----|----|----|-----|------|
| <i>Pinguipes brasilianus</i>    | Patagonia, Argentina <sup>a</sup> | 102 | (32.7–37.1)** | No | Me | 5  | 7   | [26] |
| <i>Pseudoperca semifasciata</i> | North Argentina <sup>a</sup>      | 50  | (67.5–71.2)** | No | Me | 41 | 547 | [27] |
|                                 | Patagonia, Argentina <sup>a</sup> | 50  | 67.2 ± 7.2    | No | Me | 38 | 220 | [27] |

## Pomatomidae

|                            |                     |    |             |      |   |   |    |      |
|----------------------------|---------------------|----|-------------|------|---|---|----|------|
| <i>Pomatomus saltatrix</i> | Brazil <sup>c</sup> | 55 | (32.0–52.0) | N.S. | – | 8 | 33 | [28] |
|----------------------------|---------------------|----|-------------|------|---|---|----|------|

## Priacanthidae

|                             |                     |    |             |      |   |   |    |      |
|-----------------------------|---------------------|----|-------------|------|---|---|----|------|
| <i>Priacanthus arenatus</i> | Brazil <sup>a</sup> | 58 | (14.0–54.0) | N.S. | – | 5 | 23 | [29] |
|-----------------------------|---------------------|----|-------------|------|---|---|----|------|

## Sciaenidae

|                      |                            |    |             |     |    |    |     |      |
|----------------------|----------------------------|----|-------------|-----|----|----|-----|------|
| <i>Cilus gilbert</i> | Central Chile <sup>d</sup> | 57 | (51.6–75.5) | No  | –  | 36 | 153 | [30] |
|                      | Central Chile <sup>d</sup> | 29 | (32.5–75.0) | No  | –  | 23 | 139 | [30] |
|                      | South Chile <sup>c</sup>   | 11 | –           | Yes | Mu | 6  | 15  | [6]  |

|                               |                     |     |             |      |    |   |   |      |
|-------------------------------|---------------------|-----|-------------|------|----|---|---|------|
| <i>Micropogonias furnieri</i> | Brazil <sup>a</sup> | 100 | (10.0–66.0) | N.S. | Me | 2 | 3 | [31] |
|-------------------------------|---------------------|-----|-------------|------|----|---|---|------|

## Scombridae

|                          |                              |     |             |    |    |    |   |      |
|--------------------------|------------------------------|-----|-------------|----|----|----|---|------|
| <i>Scomber japonicus</i> | North Argentina <sup>a</sup> | 173 | (29.7–53.4) | No | Me | 13 | 4 | [32] |
|                          | Brazil <sup>c</sup>          | 50  | (20.0–25.0) | No | Me | 5  | – | [33] |

## Sparidae

|                      |                     |    |             |      |    |   |    |      |
|----------------------|---------------------|----|-------------|------|----|---|----|------|
| <i>Pagrus pagrus</i> | Brazil <sup>a</sup> | 90 | (16.0–50.0) | N.S. | Me | 6 | 15 | [34] |
|----------------------|---------------------|----|-------------|------|----|---|----|------|

|                          |                                 |                              |     |               |      |        |    |    |      |
|--------------------------|---------------------------------|------------------------------|-----|---------------|------|--------|----|----|------|
| Trichiuridae             | <i>Trichiurus lepturus</i>      | Brazil <sup>a</sup>          | 55  | (108.0–148.0) | N.S. | –      | 21 | 46 | [35] |
| <b>Pleuronectiformes</b> |                                 |                              |     |               |      |        |    |    |      |
| Paralichthyidae          | <i>Hippoglossina macrops</i>    | South Chile <sup>c</sup>     | 21  | –             | Yes  | Mu     | 3  | 4  | [6]  |
|                          | <i>Hippoglossina montemaris</i> | South Chile <sup>c</sup>     | 8   | –             | Yes  | Mu     | 1  | 1  | [6]  |
|                          | <i>Paralichthys adspersus</i>   | North Chile <sup>b</sup>     | 179 | (31.2–34.2)   | Yes  | Bc, Mu | 16 | 47 | [36] |
|                          | <i>Paralichthys isosceles</i>   | North Argentina <sup>a</sup> | 51  | 28.0 ± 2.1    | Yes  | Me, Mu | 1  | 1  | [37] |
|                          | <i>Paralichthys microps</i>     | South Chile <sup>b</sup>     | 10  | (26.0–38.0)   | Yes  | Mu     | 7  | 14 | [11] |
|                          | <i>Paralichthys patagonicus</i> | North Argentina <sup>a</sup> | 51  | 35.2 ± 2.6    | Yes  | Me, Mu | 9  | 13 | [37] |
|                          | <i>Xystreurys rasile</i>        | North Argentina <sup>a</sup> | 48  | 29.3 ± 2.6    | Yes  | Me, Mu | 1  | 3  | [37] |
| <b>Scorpaeniformes</b>   |                                 |                              |     |               |      |        |    |    |      |
| Normanichthyidae         | <i>Normanichthys crockeri</i>   | South Chile <sup>a</sup>     | 11  | 9.0 ± 0.2     | No   | Mu     | 1  | 1  | [23] |
| Sebastidae               | <i>Helicolenus lengerichi</i>   | Central Chile <sup>a</sup>   | 30  | 28.1 ± 4.5    | No   | –      | 1  | 1  | [38] |
|                          |                                 | Central Chile <sup>a</sup>   | 56  | 30.9 ± 2.3    | No   | –      | 2  | 2  | [39] |
|                          | <i>Sebastes capensis</i>        | Central Chile <sup>a</sup>   | 42  | (27.5–27.8)** | No   | –      | 10 | 13 | [39] |

\*Specific identification of sealworms larvae: <sup>a</sup>*Pseudoterranova* sp.; <sup>b</sup>*P. decipiens*; <sup>c</sup>*Phocanema* sp.; <sup>d</sup>*P. cattani*.

\*\*Range calculated from host total length means.

\*\*\*Fish identified as *Genypterus brasiliensis* by the authors.

## References

- [1] Timi JT, Lanfranchi AL: **Ontogenetic changes in heterogeneity of parasite communities of fish: disentangling the relative role of compositional versus abundance variability.** *Parasitology* 2013, **140**:309-317.
- [2] Carballo MC, Navone GT, Cremonte F: **Parasites of the silversides *Odontesthes smitti* and *Odontesthes nigricans* (Pisces: Atherinopsidae) from Argentinean Patagonia.** *Comp Parasitol* 2011, **78**:95-103.
- [3] Carballo MC, Cremonte F, Navone GT, Timi JT: **Similarity in parasite community structure may be used to trace latitudinal migrations of *Odontesthes smitti* along Argentinean coasts.** *J Fish Biol* 2012, **80**:15-28.
- [4] Torres P, Contreras A, Revenga J, Fritz N: **Helminth parasites in fishes from Valdivia and Tornagaleones river estuaries in the south of Chile.** *Mem I Oswaldo Cruz* 1993, **88**:491-492.
- [5] Cortés Y, Muñoz G: **Infracomunidades de parásitos eumetazoos del bagre de mar *Aphos porosus* (Valenciennes, 1837) (Actinopterygii: Batrachoidiformes) en Chile central.** *Rev Biol Mar Oceanogr* 2008, **43**:255-263.
- [6] Torres P, Hernández E, Sandoval I: **Anisakiasis and Phocanemiasis in marine fishes from the south of Chile.** *Int J Zoonoses* 1983, **10**:146-150.
- [7] Tanzola RD, Guagliardo SE, Brizzola SM, Arias MV: **Helminth fauna of *Porichthys porosissimus* (Pisces: Batrachoidiformes) in the estuary of Bahía Blanca Argentina.** *Helminthologia* 1997, **34**:221-227.
- [8] Tavares LER, Bicudo AJA, Luque JL: **Metazoários parasitos do agulhão *Tylosurus acus* (Lacépède, 1803) (Osteichthyes: Belonidae) do litoral do estado do Rio de Janeiro, Brasil.** *Rev Bras Parasitol Vet* 2004, **13**:36-40.
- [9] Chávez RA, González MT, Oliva ME, Valdivia IM: **Endoparasite fauna of five Gadiformes fish species from the coast of Chile: host ecology versus phylogeny.** *J Helminthol* 2012, **86**:10-15.
- [10] Salinas X, González MT, Acuña E: **Metazoan parasites of the thumb grenadier *Nezumia pulchella*, from the south-eastern Pacific, off Chile, and their use for discrimination of host populations.** *J Fish Biol* 2008, **73**:683-691.
- [11] Torres P, Moya R, Lamilla J: **Nematodos anisákidos de interés en salud pública en peces comercializados en Valdivia, Chile.** *Arch Med Vet* 2000, **32**:107-113.
- [12] George-Nascimento M, Arancibia H: **La fauna parasitaria y la morfometría de la merluza austral *Merluccius australis* (Hutton) como indicadores de unidades de stock.** *Biol Pesq* 1994, **23**:31-47.
- [13] George-Nascimento M: **Populations and assemblages of parasites in hake, *Merluccius gayi*, from southeastern Pacific Ocean: Stock implications.** *J Fish Biol* 1996, **48**:557-568.
- [14] Sardella NH, Timi JT: **Parasites of Argentine hake in the Argentine sea: population and infracommunity structure as evidence for host stock discrimination.** *J Fish Biol* 2004, **65**:1472-1488.
- [15] Herreras MV, Aznar FJ, Balbuena JA, Raga JA: **Anisakid larvae in the musculature of the Argentinean hake, *Merluccius hubbsi*.** *J Food Protect* 2000, **63**:1141-1143.
- [16] Fernández J: **Los parásitos de la lisa *Mugil cephalus* L., en Chile: sistemática y aspectos poblacionales (Perciformes: Mugilidae).** *Gayana, Zool* 1987, **51**:3-58.

- [17] Torres P, González H: **Determinación de larvas de *Terranova* (=Phocanema) y *Anisakis* en *Genypterus* sp. Aspectos morfométricos e histopatológicos a nivel hepático.** *Bol Chil Parasitol* 1978, **33**:82-86.
- [18] Sardella NH, Avedaño MF, Timi JT: **Parasite communities of *Genypterus blacodes* and *Genypterus brasiliensis* (Pisces: Ophidiidae) from Argentina.** *Helminthologia* 1998, **35**:209-218.
- [19] Alves DR, Luque JL, Paraguassú AR: **Community ecology of the metazoan parasites of pink cusk-eel, *Genypterus brasiliensis* (Osteichthyes: Ophidiidae), from the coastal zone of the state of Rio de Janeiro, Brazil.** *Mem I Oswaldo Cruz* 2002, **97**:683-689.
- [20] Knoff M, São Clemente SC, Fonseca MCG, Andrada CG, Padovani RES, Gomes DC: **Anisakidae parasitos de congrio-rosa, *Genypterus brasiliensis* Regan, 1903 comercializados no estado do Rio de Janeiro, Brasil de interesse na saúde pública.** *Parasitol Latinoam* 2007, **62**:127-133.
- [21] Vergara LA, George-Nascimento M: **Contribución al estudio del parasitismo en el congrio colorado *Genypterus chilensis* (Guichenot, 1848).** *Bol Chil Parasitol* 1982, **37**:9-14.
- [22] Vales DG, García NA, Crespo EA, Timi JT: **Parasites of a marine benthic fish in the Southwestern Atlantic: searching for geographical recurrent patterns of community structure.** *Parasitol Res* 2011, **108**:261-272.
- [23] Sepúlveda F, Marín SL, Carvajal J: **Metazoan parasites in wild fish and farmed salmon from aquaculture sites in southern Chile.** *Aquaculture* 2004, **235**:89-100.
- [24] Luque JL, Alves DR: **Ecologia das comunidades de metazoários parasitos, do xaréu, *Caranx hippos* (Linnaeus) e do xerelete, *Caranx latus* Agassiz (Osteichthyes, Carangidae) do litoral do estado do Rio de Janeiro, Brasil.** *Rev Bras Zool* 2001, **18**:399-410.
- [25] George-Nascimento M, Arancibia H: **Stocks ecológicos del jurel (*Trachurus symmetricus murphyi* Nichols) en tres zonas de pesca frente a Chile, detectados mediante comparación de su fauna parasitaria y morfometría.** *Rev Chil Hist Nat* 1992, **65**:453-70.
- [26] Timi JT, Lanfranchi AL, Etchegoin JA, Cremonte F: **Parasites of the Brazilian sandperch *Pinguipes brasilianus* Cuvier: a tool for stock discrimination in the Argentine Sea.** *J Fish Biol* 2008, **72**:1332-1342.
- [27] Timi JT, Lanfranchi AL: **The metazoan parasite communities of the Argentinean sandperch *Pseudoperca semifasciata* (Pisces: Perciformes) and their use to elucidate the stock structures of the host.** *Parasitology* 2009, **136**:1209-1219.
- [28] Luque JL, Chaves ND: **Ecologia da comunidade de metazoários parasitos da anchova *Pomatomus saltator* (Linnaeus) (Osteichthyes, Pomatomidae) do litoral do estado do Rio de Janeiro, Brasil.** *Rev Brasil Zool* 1999, **16**:711-723.
- [29] Tavares LER, Luque JL, Neto SLB: **Ecologia da comunidade de metazoários parasitos do olho-de cão *Priacanthus arenatus* (Cuvier, 1829) (Osteichthyes, Priacanthidae) do litoral do estado do Rio de Janeiro, Brasil.** *Rev Brasil Zool* 2001, **3**:45-59.
- [30] Garcías F, Mendoza R, George-Nascimento M: **Variación entre años de las infracomunidades de parásitos metazoos de la corvine *Cilus gilberti* (Pisces: Sciaenidae) en Chile.** *Rev Chil Hist Nat* 2001, **7**:833-840.
- [31] Alves DR, Luque JL: **Community ecology of the metazoan parasites of white croaker, *Micropogonias furnieri* (Osteichthyes: Sciaenidae), from the coastal zone of the state of Rio de Janeiro, Brazil.** *Mem I Oswaldo Cruz* 2001, **96**:145-53.

- [32] Cremonte F, Sardela NH: **The parasito fauna of *Scomber japonicus* Houttuyn, 1782 (Pisces: Scombridae) in two zones of the Argentine sea.** *Fish Res* 1997, **31**:1-9.
- [33] Rego AA, Santos CP: **Helmintofauna de cavalas, *Scomber japonicus* Houtt, do Rio de Janeiro.** *Mem I Oswaldo Cruz* 1983, **78**:443-48.
- [34] Paraguassú AR, Luque JL, Alves DR: **Community ecology of the metazoan parasites of red porgy, *Pagrus pagrus* (L., 1758) (Osteichthyes, Sparidae), from the coastal zone, State of Rio de Janeiro, Brazil.** *Maringá* 2002, **24**:461-467.
- [35] Silva LO, Luque JL, Alves DR, Paraguassú AR: **Ecologia da comunidade de metazoários parasitos do peixe-espada *Trichiurus lepturus* Linnaeus (Osteichthyes, Trichiuridae) do litoral do estado do Rio de Janeiro, Brasil.** *Rev Brasil Zool* 2000, **2**:115-133.
- [36] Oliva ME, Castro RE, Burgos R: **Parasites of the flatfish *Paralichthys adspersus* (Steindachner, 1867) (Pleuronectiformes) from Northern Chile.** *Mem I Oswaldo Cruz* 1996, **91**:301-306.
- [37] Alarcos AJ, Timi JT: **Parasite communities in three sympatric flounder species (Pleuronectiformes: Paralichthyidae).** *Parasitol Res* 2012, **110**:2155-2166.
- [38] George-Nascimento M, Iriarte JL: **Las infracomunidades de parásitos metazoos del chancharro *Helicolenus lengerichi* Norman, 1937 (Pisces, Scorpaenidae): un ensamble no interactive de especies.** *Rev Chil Hist Nat* 1989, **62**:217-27.
- [39] Balboa L, George-Nascimento M: **Variaciones ontogenéticas y entre años en las infracomunidades de parásitos metazoos de dos especies de peces marinos de Chile.** *Rev Chil Hist Nat* 1998, **71**:27-37.
